# Supplementary material for: Production of Camellia oleifera Abel Seed Oil for Injection: Extraction, Analysis, Deacidification, Decolorization, and Deodorization
Source: MDPI journal article supplement (doi:10.3390/foods13101430), 2024-05-07
Supplement: s1 [file s1]

**Production of *Camellia oleifera* Abel seed oil for injection: Extraction, Analysis, Deacidification, Decolorization and Deodorization**

Zhang Han<sup>1</sup>, Han Mei<sup>1</sup>, Nie Xue-Jiao<sup>1</sup>, Fu Xiao-Meng<sup>12</sup>, Hong Kun-Qiang<sup>1\*</sup>, He Dong-Ping<sup>1</sup>

<sup>1</sup>Key Laboratory of Edible Oil Quality and Safety for State Market Regulation, Hubei Key Laboratory for Processing and Transformation of Agricultural Products,  
College of Food Science and Engineering, Wuhan Polytechnic University, 68 Xuefu South Road, Changqing Garden, Wuhan, 430023, P. R. CHINA

<sup>2</sup>School of Chemical Engineering and Technology, Tianjin University, Tianjin 300350, P.R. CHINA

\* Corresponding author: Kun-Qiang Hong

E-mail: hongkq@whpu.edu.cn; Phone: +86-13237172182;

Address: Wuhan Polytechnic University, 68 Xuefu South Road, Changqing Garden, Wuhan, 430023, P. R. CHINA

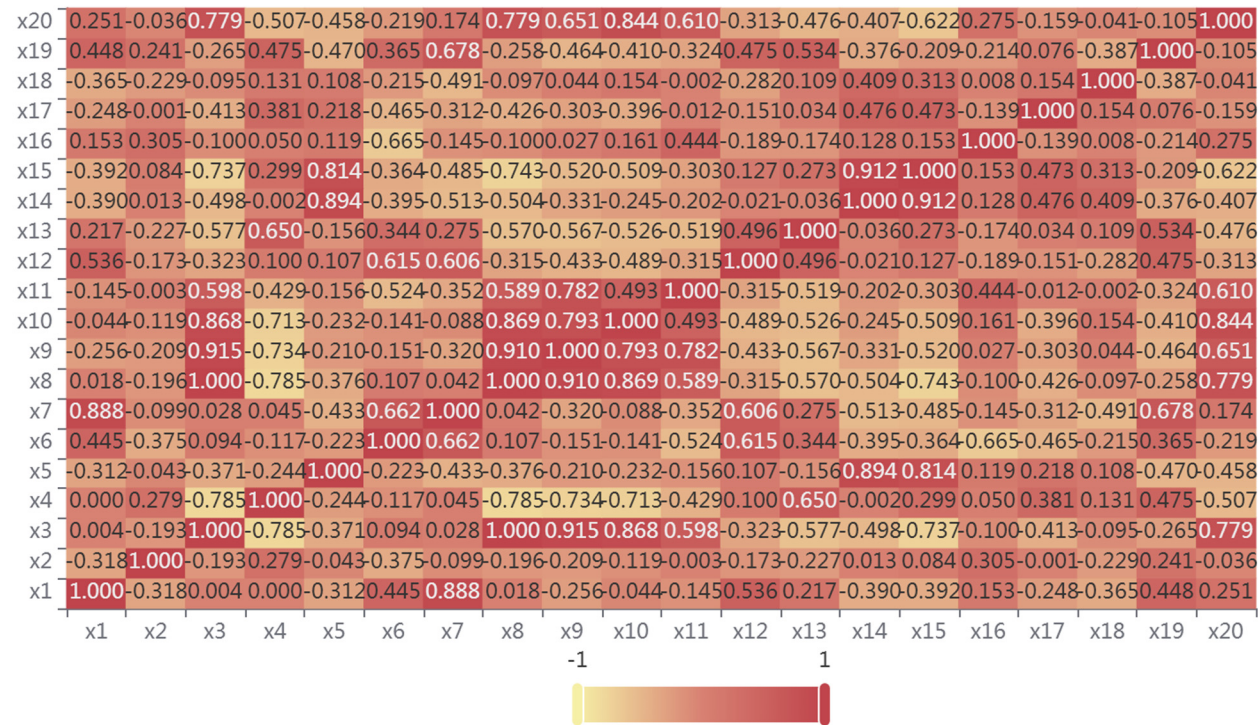

Figure S1 Correlation coefficient heat map

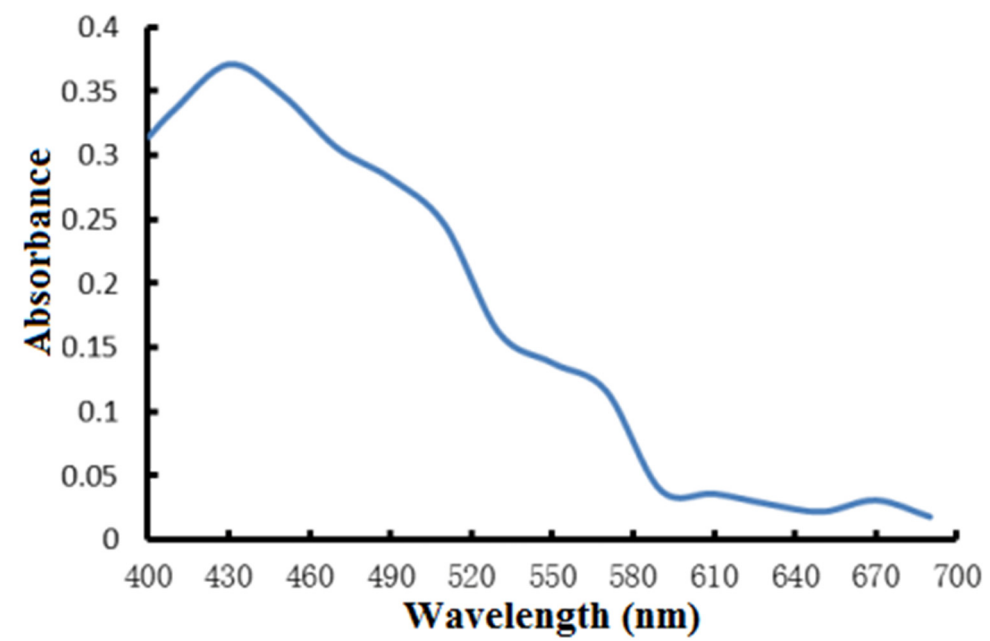

Figure S2 Absorption wavelength of CSO.

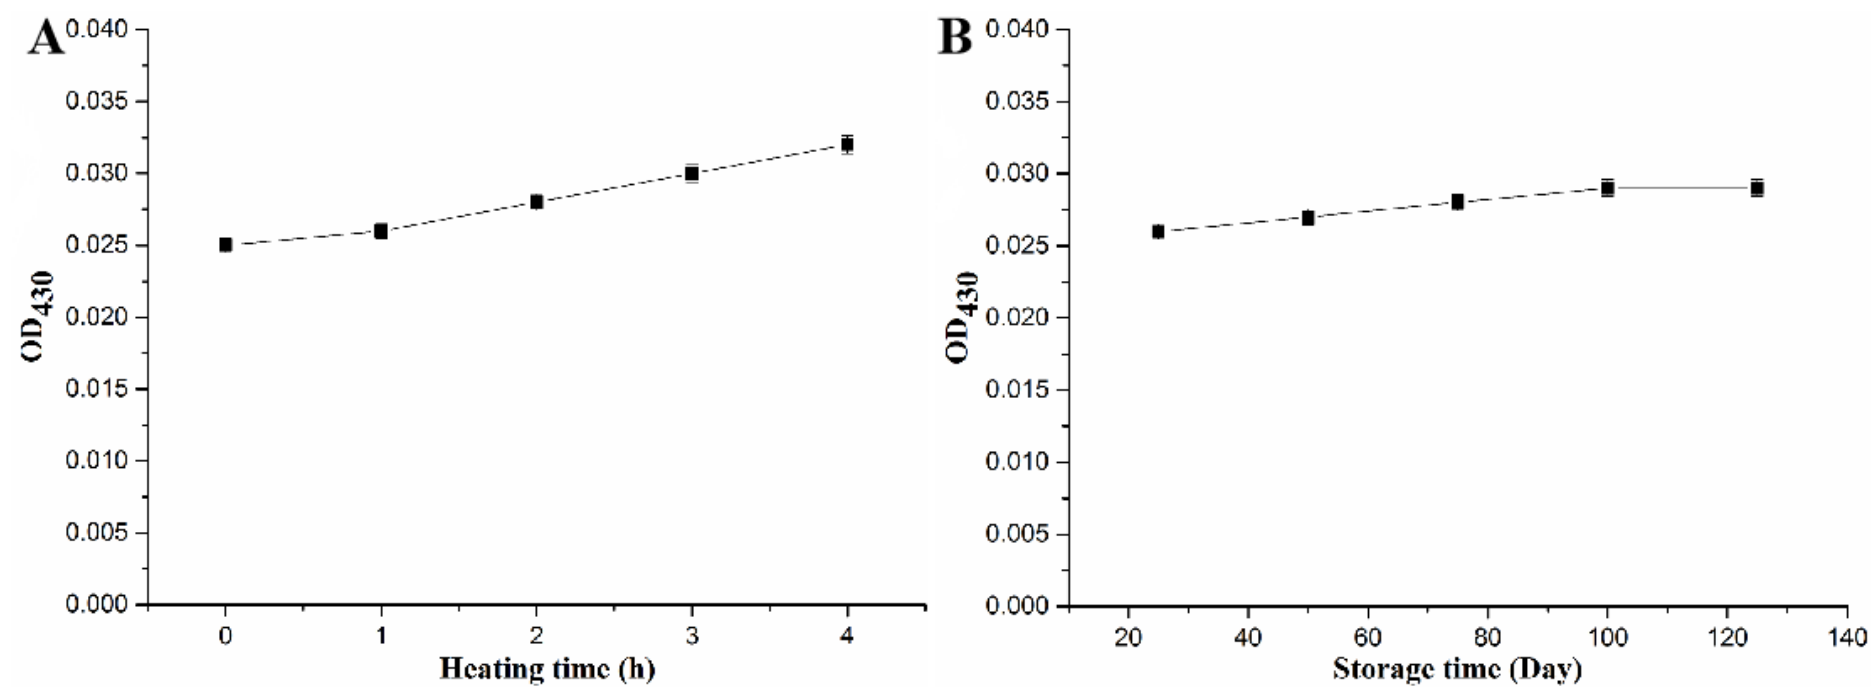

Figure S3 The effect of heating time (A) and storage time (B) on the color of refined CSO.

Supplemental material Table S1 Plackett-Burman test for oil extraction and protein extraction<sup>a</sup>

| N<br>O. | Ultrasonic<br>temperature | Ultrasonic<br>time | Ultrasonic<br>power | Material-liquid<br>ratio | Amount<br>of<br>enzyme<br>added | Reaction<br>pH | Reaction<br>temperature | Reaction<br>time | Oil<br>extraction<br>rate(%) | Protein<br>extraction<br>rate(%) | Oil<br>extraction<br>rate<br>membership | Protein<br>extraction<br>rate<br>membership | Comprehensive<br>membership |
|---------|---------------------------|--------------------|---------------------|--------------------------|---------------------------------|----------------|-------------------------|------------------|------------------------------|----------------------------------|-----------------------------------------|---------------------------------------------|-----------------------------|
| 1       | -1                        | -1                 | 1                   | -1                       | 1                               | 1              | -1                      | 1                | 86.68                        | 90.25                            | 0.278                                   | 0.686                                       | 0.482                       |
| 2       | -1                        | -1                 | -1                  | 1                        | -1                              | 1              | 1                       | -1               | 86.23                        | 89.1                             | 0.201                                   | 0.47                                        | 0.335                       |
| 3       | 1                         | 1                  | -1                  | 1                        | 1                               | 1              | -1                      | -1               | 87.23                        | 87.07                            | 0.385                                   | 0.088                                       | 0.236                       |
| 4       | -1                        | 1                  | 1                   | 1                        | -1                              | -1             | -1                      | 1                | 90.44                        | 88.86                            | 1                                       | 0.424                                       | 0.712                       |
| 5       | -1                        | -1                 | -1                  | -1                       | -1                              | -1             | -1                      | -1               | 88.84                        | 86.61                            | 0.692                                   | 0                                           | 0.346                       |
| 6       | 1                         | -1                 | 1                   | 1                        | -1                              | 1              | 1                       | 1                | 87.93                        | 87.55                            | 0.519                                   | 0.178                                       | 0.348                       |
| 7       | 1                         | -1                 | 1                   | 1                        | 1                               | -1             | -1                      | -1               | 87.78                        | 88.19                            | 0.49                                    | 0.298                                       | 0.394                       |
| 8       | -1                        | 1                  | 1                   | -1                       | 1                               | 1              | 1                       | -1               | 85.22                        | 89.71                            | 0                                       | 0.584                                       | 0.292                       |
| 9       | 1                         | 1                  | 1                   | -1                       | -1                              | -1             | 1                       | -1               | 87.23                        | 88.47                            | 0.384                                   | 0.35                                        | 0.367                       |
| 10      | 1                         | -1                 | -1                  | -1                       | 1                               | -1             | 1                       | 1                | 88.73                        | 87.90                            | 0.672                                   | 0.244                                       | 0.458                       |
| 11      | -1                        | 1                  | -1                  | 1                        | 1                               | -1             | 1                       | 1                | 87.22                        | 91.92                            | 0.382                                   | 1                                           | 0.691                       |
| 12      | 1                         | 1                  | -1                  | -1                       | -1                              | 1              | -1                      | 1                | 87.65                        | 88.23                            | 0.465                                   | 0.305                                       | 0.385                       |

<sup>a</sup>A-Ultrasonic time; B-Ultrasonic temperature; C-Ultrasonic power; D-Material-liquid ratio; E-Amount of enzyme added; F-Reaction pH; G-Reaction temperature; H-Reaction time

$$\text{Membership} = \frac{\text{target values} - \text{Minimum target value}}{\text{Maximum target value} - \text{Minimum target value}}$$

$$\text{Comprehensive membership} = 0.5 \times \text{Oil extraction rate membership} + 0.5 \times \text{Protein extraction rate membership}$$

Supplemental material Table S2 Variance and significance analysis of Plackett-Burman test

[illegible]

Supplemental material Table S3 Experimental design and results of Box-Benhnken in oil extraction and protein extraction

| NO. | A-Ultrasonic time <sup>a</sup> | F-Reaction pH <sup>b</sup> | H-Reaction time <sup>c</sup> | Oil extraction rate(%) | Protein extraction rate(%) | Oil extraction rate membership | Protein extraction rate membership | Comprehensive membership |
|-----|--------------------------------|----------------------------|------------------------------|------------------------|----------------------------|--------------------------------|------------------------------------|--------------------------|
| 1   | -1                             | -1                         | 0                            | 85.63                  | 90.01                      | 0.18                           | 0.65                               | 0.42                     |
| 2   | -1                             | 1                          | 0                            | 86.75                  | 92.11                      | 0.33                           | 0.94                               | 0.64                     |
| 3   | 0                              | 1                          | -1                           | 87.69                  | 90.11                      | 0.46                           | 0.67                               | 0.56                     |
| 4   | 0                              | -1                         | 1                            | 88.95                  | 85.23                      | 0.63                           | 0.00                               | 0.32                     |
| 5   | -1                             | 0                          | -1                           | 88.75                  | 85.69                      | 0.61                           | 0.06                               | 0.33                     |
| 6   | -1                             | 0                          | 1                            | 87.96                  | 88.12                      | 0.50                           | 0.39                               | 0.45                     |
| 7   | 0                              | 0                          | 0                            | 90.21                  | 90.89                      | 0.81                           | 0.77                               | 0.79                     |
| 8   | 0                              | 0                          | 0                            | 90.12                  | 90.98                      | 0.79                           | 0.79                               | 0.79                     |
| 9   | 1                              | -1                         | 0                            | 87.56                  | 89.23                      | 0.44                           | 0.55                               | 0.49                     |
| 10  | 1                              | 0                          | -1                           | 86.21                  | 91.36                      | 0.26                           | 0.84                               | 0.55                     |
| 11  | 0                              | -1                         | -1                           | 84.32                  | 92.55                      | 0.00                           | 1.00                               | 0.50                     |
| 12  | 0                              | 1                          | 1                            | 88.01                  | 88.56                      | 0.50                           | 0.45                               | 0.48                     |
| 13  | 1                              | 0                          | 1                            | 84.52                  | 91.01                      | 0.03                           | 0.79                               | 0.41                     |
| 14  | 0                              | 0                          | 0                            | 91.63                  | 92.01                      | 1.00                           | 0.93                               | 0.96                     |
| 15  | 1                              | 1                          | 0                            | 90.32                  | 88.30                      | 0.82                           | 0.42                               | 0.62                     |

<sup>a</sup>Ultrasonic time was set to 20 (-1), 30 (0) and 40 (1) min;

<sup>b</sup>Reaction pH was set to 8 (-1), 9 (0) and 10 (1);

<sup>c</sup>Reaction time was set to 3(-1), 3.5(0) and 4(1)h.

$$\text{Membership} = \frac{\text{target values} - \text{Minimum target value}}{\text{Maximum target value} - \text{Minimum target value}}$$

$$\text{Comprehensive membership} = 0.5 \times \text{Oil extraction rate membership} + 0.5 \times \text{Protein extraction rate membership}$$

Supplemental material Table S4 Variance analysis of parameters in regression equation of integrated membership grade in oil extraction and protein extraction

| Source        | Sum of Squares | df | Mean Square | Value | p-value | Significance |
|---------------|----------------|----|-------------|-------|---------|--------------|
| Model         | 0.33           | 9  | 0.037       | 16.17 | 0.0034  | **           |
| A-A           | 6.61E-03       | 1  | 6.61E-03    | 2.89  | 0.1497  |              |
| F-F           | 0.041          | 1  | 0.041       | 17.77 | 0.0084  | *            |
| H-H           | 9.80E-03       | 1  | 9.80E-03    | 4.29  | 0.0931  | *            |
| AF            | 2.03E-03       | 1  | 2.03E-03    | 0.89  | 0.3897  |              |
| AH            | 0.017          | 1  | 0.017       | 7.4   | 0.0418  | *            |
| FH            | 2.50E-03       | 1  | 2.50E-03    | 1.09  | 0.3435  |              |
| A^2           | 0.071          | 1  | 0.071       | 31.11 | 0.0026  | **           |
| F^2           | 0.044          | 1  | 0.044       | 19.11 | 0.0072  | **           |
| H^2           | 0.17           | 1  | 0.17        | 75.57 | 0.0003  | **           |
| Residual      | 0.011          | 5  | 2.29E-03    |       |         |              |
| Lack of Fit   | 0.011          | 3  | 3.81E-03    |       |         |              |
| Pure Error    | 0              | 2  | 0           |       |         |              |
| Cor Total     | 0.34           | 14 |             |       |         |              |
| R-Squared     | 0.9668         |    |             |       |         |              |
| Adj R-Squared | 0.9027         |    |             |       |         |              |

$$Y1 = -24.84850 + 0.20836 \times A + 2.43025 \times F + 6.51175 \times H - 7.275E^{-3} \times AF + 0.0181 \times AH + 0.0985 \times FH - 1.26E^{-3} \times A^2 - 0.13825 \times F^2 - 0.99 \times H^2$$



Supplemental material Table S5 The physicochemical indexes of 11 vegetable oils

| Indexes <sup>a</sup> | soybean oil | rapeseed oil | camellia seed oil | sunflower oil | olive oil   | walnut oil  | peanut oil  | rice oil    | flaxseed oil | corn oil    | sesame oil  |
|----------------------|-------------|--------------|-------------------|---------------|-------------|-------------|-------------|-------------|--------------|-------------|-------------|
| C16:0, PA/%          | 10.52±0.10  | 4.51±0.05    | 7.32±0.08         | 5.47±0.06     | 9.22±0.11   | 5.3±0.06    | 11.71±0.12  | 18.12±0.18  | 6.08±0.07    | 12.34±0.16  | 8.74±0.11   |
| C18:0, SA/%          | 3.83±0.04   | 2.58±0.03    | 2.24±0.02         | 5.42±0.07     | 3.43±0.04   | 2.21±0.02   | 3.4±0.04    | 1.68±0.018  | 3.24±0.05    | 2.01±0.02   | 5.62±0.07   |
| C18:1,OA/%           | 24.4±0.29   | 59.11±0.76   | 80.82±1.13        | 23.21±0.32    | 79.61±1.14  | 17.67±0.24  | 41.86±0.54  | 40.22±0.48  | 19.16±0.21   | 29.16±0.32  | 39.04±0.56  |
| C18:2,LA/%           | 52.16±0.67  | 20.68±0.29   | 8.26±0.12         | 63.56±0.95    | 4.79±0.071  | 65.1±0.97   | 36.88±0.51  | 31.02±0.43  | 17.25±0.20   | 54.87±0.65  | 45.62±0.79  |
| C18:3,LNA/%          | 6.72±0.09   | 6.68±0.11    | 0.41±0.07         | 0.18±0.02     | 0.68±0.01   | 7.28±0.11   | 0.62±0.09   | 0.65±0.09   | 53.34±0.69   | 0.72±0.09   | 0.38±0.04   |
| OFA/%                | 1.92±0.02   | 6.44±0.10    | 0.59±0.07         | 2.16±0.02     | 2.27±0.07   | 2.44±0.02   | 5.53±0.08   | 8.31±0.12   | 0.93±0.01    | 0.96±0.01   | 0.6±0.07    |
| SFA/%                | 15.37±0.24  | 13.11±0.15   | 9.81±0.18         | 12.89±0.16    | 14.68±0.19  | 9.51±0.12   | 16.34±0.19  | 22.86±0.36  | 9.54±0.14    | 15±0.22     | 14.75±0.20  |
| MFA/%                | 25.52±0.30  | 59.51±0.77   | 81.08±1.35        | 23.81±0.33    | 80.61±1.12  | 18.29±0.25  | 43.09±0.56  | 41.72±0.5   | 19.56±0.31   | 29.52±0.47  | 39.35±0.43  |
| MFA/SFA              | 1.66±0.02   | 4.54±0.06    | 8.26±0.91         | 1.84±0.02     | 5.49±0.06   | 1.92±0.02   | 2.63±0.03   | 1.82±0.02   | 2.05±0.02    | 1.96±0.02   | 2.66±0.03   |
| MFA/PFA              | 0.45±0.06   | 2.18±0.03    | 8.99±0.08         | 0.37±0.04     | 14.73±0.17  | 0.25±0.00   | 1.14±0.01   | 1.31±0.01   | 0.27±0.01    | 0.53±0.06   | 0.87±0.01   |
| MFA/OFA              | 13.29±0.14  | 9.24±0.11    | 137.42±1.86       | 11.02±0.14    | 35.51±0.46  | 7.49±0.09   | 7.79±0.09   | 5.02±0.05   | 21.03±0.23   | 30.75±0.33  | 65.58±0.91  |
| AV/(mg/g)            | 3.25±0.03   | 3.51±0.04    | 3.06±0.03         | 3.67±0.05     | 2.49±0.03   | 3.25±0.04   | 3.36±0.04   | 5.48±0.06   | 3.81±0.04    | 3.17±0.038  | 3.61±0.05   |
| PV/(mmol/kg)         | 6.7±0.08    | 5.88±0.08    | 5.38±0.01         | 6.69±0.1      | 5.1±0.07    | 6.9±0.10    | 5.4±0.07    | 7.01±0.09   | 5.46±0.05    | 6.09±0.06   | 5.2±0.05    |
| RI/n <sup>40</sup>   | 1.47±0.02   | 1.47±0.01    | 1.46±0.03         | 1.46±0.02     | 1.47±0.023  | 1.47±0.02   | 1.46±0.01   | 1.46±0.02   | 1.48±0.016   | 1.46±0.016  | 1.46±0.01   |
| IV/(g/100g)          | 133.28±1.99 | 110.16±0.32  | 96.28±1.59        | 136.22±1.49   | 94.43±1.08  | 156.48±1.72 | 90.17±1.08  | 108.42±1.62 | 194.36±2.32  | 123.46±1.48 | 117.51±1.52 |
| SV/ (mg/g)           | 192.79±3.08 | 174.51±2.26  | 194.46±2.33       | 191.11±2.29   | 190.35±2.24 | 186.72±2.24 | 189.21±2.45 | 186.61±2.98 | 192.42±2.50  | 189.5±2.46  | 191.02±2.67 |
| UA/ (mg/g)           | 10.91±0.13  | 12.8±0.17    | 8.41±0.19         | 9.15±0.11     | 8.12±0.10   | 13.8±0.17   | 5.72±0.08   | 7.56±0.09   | 13.12±0.18   | 18.1±0.25   | 15.31±0.22  |
| Price/(yuan/L)       | 8±0.10      | 16.01±0.24   | 70.01±0.98        | 14±0.19       | 120.1±1.68  | 300±4.2     | 26±0.39     | 20±0.26     | 75±1.12      | 18±0.27     | 53±0.84     |
| MAV/(%)              | 0.02±0.001  | 0.02±0.02    | 0.01±0.01         | 0.01±0        | 0.01±0      | 0.01±0.01   | 0.012±0     | 0.012±0.01  | 0.01±0.01    | 0.01±0.02   | 0.017±0.04  |
| IT/(h)               | 2.11±0.025  | 1.99±0.021   | 6.75±0.11         | 2.24±0.03     | 8.85±0.13   | 1.15±0.01   | 1.92±0.02   | 4.06±0.04   | 0.83±0.09    | 4.65±0.05   | 5.07±0.06   |

<sup>a</sup>C16:0, PA-Palmitic acid; C18:0, SA-Stearic acid; C18:1,OA-Oleic acid; C18:2,LA-Linoleic acid; C18:3,LNA-Linolenic acid; OFA-Other fatty acids; SFA-Saturated fatty acid;

MFA-Monounsaturated fatty acids; MFA/SFA-Monounsaturated fatty acids/saturated fatty acids; MFA/PFA-Monounsaturated fatty acids / polyunsaturated fatty acids;

MFA/OFA-Monounsaturated fatty acids/other fatty acids; AV-Acid value; PV-Peroxide value; RI-Refractive index; IV-Iodine value;SV-Saponification value; UA-Unsaponifiable; Price (CNY);

MAV-Moisture and volatiles; IT-Induction time

Supplemental material Table S6 The correlate matrix between the factors<sup>a</sup>

|    | x1            | x2            | x3              | x4              | x5            | x6            | x7              | x8              | x9              | x10             | x11           | x12           | x13           | x14           | x15             | x16          | x17           | x18           | x19          | x20             |
|----|---------------|---------------|-----------------|-----------------|---------------|---------------|-----------------|-----------------|-----------------|-----------------|---------------|---------------|---------------|---------------|-----------------|--------------|---------------|---------------|--------------|-----------------|
| x1 | 1(0.00***)    | -0.318(0.340) | 0.004(0.990)    | 0.000(0.990)    | -0.312(0.350) | 0.445(0.171)  | 0.888(0.000***) | 0.018(0.959)    | -0.256(0.48)    | -0.044(0.98)    | -0.145(0.71)  | 0.536(0.089*) | 0.217(0.21)   | -0.396(0.6)   | -0.392(0.33)    | 0.153(0.654) | -0.248(0.462) | -0.365(0.269) | 0.448(0.66)  | 0.251(0.457)    |
| x2 | -0.318(0.340) | 1(0.00***)    | -0.193(0.569)   | 0.279(0.407)    | -0.043(0.900) | -0.375(0.255) | -0.097(0.73)    | -0.196(0.63)    | -0.209(0.37)    | -0.112(0.28)    | -0.003(0.93)  | -0.171(0.11)  | -0.227(0.03)  | 0.013(0.970)  | 0.084(0.806)    | 0.305(0.362) | -0.001(0.997) | -0.229(0.499) | 0.241(0.75)  | -0.036(0.917)   |
| x3 | 0.004(0.990)  | -0.193(0.569) | 1(0.00***)      | -0.785(0.04***) | -0.371(0.261) | 0.094(0.782)  | 0.028(0.935)    | 1(0.00***)      | 0.915(0.000***) | 0.868(0.001***) | 0.598(0.052*) | -0.323(0.33)  | -0.577(0.63*) | -0.498(0.19)  | -0.737(0.10***) | -0.1(0.769)  | -0.413(0.207) | -0.095(0.782) | -0.265(0.31) | 0.779(0.005***) |
| x4 | 0.000(0.999)  | 0.279(0.407)  | -0.785(0.04***) | 1(0.00***)      | -0.244(0.69)  | -0.117(0.31)  | 0.045(0.896)    | -0.785(0.04***) | -0.734(0.10**)  | -0.713(0.14**)  | -0.429(0.88)  | 0.1(0.771)    | 0.65(0.03**)  | -0.002(0.96)  | 0.299(0.372)    | 0.05(0.884)  | 0.381(0.248)  | 0.131(0.702)  | 0.475(0.40)  | -0.507(0.112)   |
| x5 | -0.312(0.350) | -0.043(0.900) | -0.371(0.261)   | -0.244(0.69)    | 1(0.00***)    | -0.223(0.309) | -0.433(0.84)    | -0.376(0.54)    | -0.216(0.6)     | -0.239(0.93)    | -0.154(0.46)  | 0.105(0.54)   | -0.157(0.48)  | 0.894(0.0***) | 0.814(0.2***)   | 0.119(0.7)   | 0.218(0.519)  | 0.108(0.752)  | -0.475(0.5)  | -0.458(0.56)    |

|         |                         |                           |                         |                             |                       |                            |                        |                         |                         |                         |                         |                            |                        |                       |                             |                             |                           |                           |                            |                         |
|---------|-------------------------|---------------------------|-------------------------|-----------------------------|-----------------------|----------------------------|------------------------|-------------------------|-------------------------|-------------------------|-------------------------|----------------------------|------------------------|-----------------------|-----------------------------|-----------------------------|---------------------------|---------------------------|----------------------------|-------------------------|
| x<br>6  | 0.445<br>(0.17<br>1)    | -0.3<br>75(0<br>.255<br>) | 0.094<br>(0.78<br>2)    | -0.11<br>7(0.7<br>31)       | -0.22<br>3(0.5<br>09) | 1(0.0<br>00**<br>)         | 0.662<br>(0.02<br>6**) | 0.107<br>(0.75<br>5)    | -0.15<br>1(0.6<br>57)   | -0.14<br>1(0.6<br>80)   | -0.52<br>4(0.0<br>98*)  | 0.61<br>5(0.0<br>44**<br>) | 0.34<br>4(0.3<br>00)   | -0.39<br>5(0.2<br>30) | -0.36<br>4(0.2<br>71)       | -0.66<br>5(0.0<br>26**<br>) | -0.4<br>65(0<br>.150<br>) | -0.2<br>15(0<br>.526<br>) | 0.36<br>5(0.2<br>69)       | -0.21<br>9(0.5<br>18)   |
| x<br>7  | 0.888<br>(0.00<br>0***) | -0.0<br>99(0<br>.773<br>) | 0.028<br>(0.93<br>5)    | 0.045<br>(0.89<br>6)        | -0.43<br>3(0.1<br>84) | 0.662<br>(0.02<br>6**<br>) | 1(0.0<br>00**<br>)     | 0.042<br>(0.90<br>2)    | -0.32<br>(0.33<br>7)    | -0.08<br>8(0.7<br>97)   | -0.35<br>2(0.2<br>88)   | 0.60<br>6(0.0<br>48**<br>) | 0.27<br>5(0.4<br>13)   | -0.51<br>3(0.1<br>07) | -0.48<br>5(0.1<br>30)       | -0.14<br>5(0.6<br>70)       | -0.3<br>12(0<br>.349<br>) | -0.4<br>91(0<br>.125<br>) | 0.67<br>8(0.0<br>22**<br>) | 0.174<br>(0.60<br>9)    |
| x<br>8  | 0.018<br>(0.95<br>9)    | -0.1<br>96(0<br>.563<br>) | 1(0.0<br>00**<br>)      | -0.78<br>5(0.0<br>04**<br>) | -0.37<br>6(0.2<br>54) | 0.107<br>(0.75<br>5)       | 0.042<br>(0.90<br>2)   | 1(0.0<br>00**<br>)      | 0.91(<br>0.000<br>***)  | 0.869<br>(0.00<br>1***) | 0.589<br>(0.05<br>7*)   | -0.31<br>5(0.3<br>45)      | -0.57<br>(0.06<br>7*)  | -0.50<br>4(0.1<br>14) | -0.74<br>3(0.0<br>09**<br>) | -0.1(<br>0.769<br>)         | -0.4<br>26(0<br>.192<br>) | -0.0<br>97(0<br>.776<br>) | -0.25<br>8(0.4<br>44)      | 0.779<br>(0.00<br>5***) |
| x<br>9  | -0.25<br>6(0.4<br>48)   | -0.2<br>09(0<br>.537<br>) | 0.915<br>(0.00<br>0***) | -0.73<br>4(0.0<br>10**)     | -0.21<br>(0.53<br>6)  | -0.15<br>1(0.6<br>57)      | -0.32<br>(0.33<br>7)   | 0.91(<br>0.000<br>***)  | 1(0.0<br>00**<br>)      | 0.793<br>(0.00<br>4***) | 0.782<br>(0.00<br>4***) | -0.43<br>3(0.1<br>84)      | -0.56<br>7(0.0<br>69*) | -0.33<br>1(0.3<br>20) | -0.52(<br>0.101<br>)        | 0.027<br>(0.93<br>6)        | -0.3<br>03(0<br>.365<br>) | 0.04<br>4(0.<br>897)      | -0.46<br>4(0.1<br>51)      | 0.651<br>(0.03<br>0**)  |
| x<br>10 | -0.04<br>4(0.8<br>98)   | -0.1<br>19(0<br>.728<br>) | 0.868<br>(0.00<br>1***) | -0.71<br>3(0.0<br>14**)     | -0.23<br>2(0.4<br>93) | -0.14<br>1(0.6<br>80)      | -0.08<br>8(0.7<br>97)  | 0.869<br>(0.00<br>1***) | 0.793<br>(0.00<br>4***) | 1(0.0<br>00**<br>)      | 0.493<br>(0.12<br>3)    | -0.48<br>9(0.1<br>27)      | -0.52<br>6(0.0<br>97*) | -0.24<br>5(0.4<br>67) | -0.50<br>9(0.1<br>10)       | 0.161<br>(0.63<br>7)        | -0.3<br>96(0<br>.228<br>) | 0.15<br>4(0.<br>652)      | -0.41<br>(0.21<br>0)       | 0.844<br>(0.00<br>1***) |
| x<br>11 | -0.14<br>5(0.6<br>71)   | -0.0<br>03(0<br>.993<br>) | 0.598<br>(0.05<br>2*)   | -0.42<br>9(0.1<br>88)       | -0.15<br>6(0.6<br>46) | -0.52<br>4(0.0<br>98*)     | -0.35<br>2(0.2<br>88)  | 0.589<br>(0.05<br>7*)   | 0.782<br>(0.00<br>4***) | 0.493<br>(0.12<br>3)    | 1(0.0<br>00**<br>)      | -0.31<br>5(0.3<br>46)      | -0.51<br>9(0.1<br>02)  | -0.20<br>2(0.5<br>51) | -0.30<br>3(0.3<br>65)       | 0.444<br>(0.17<br>1)        | -0.0<br>12(0<br>.973<br>) | -0.0<br>02(0<br>.995<br>) | -0.32<br>4(0.3<br>31)      | 0.61(<br>0.046<br>**)   |
| x<br>1  | 0.536<br>(0.08          | -0.1<br>73(0              | -0.32<br>3(0.3          | 0.1(0.<br>771)              | 0.107<br>(0.75        | 0.615<br>(0.04             | 0.606<br>(0.04         | -0.31<br>5(0.3          | -0.43<br>3(0.1          | -0.48<br>9(0.1          | -0.31<br>5(0.3          | 1(0.0<br>00**              | 0.49<br>6(0.1          | -0.02<br>1(0.9        | 0.127<br>(0.70              | -0.18<br>9(0.5              | -0.1<br>51(0              | -0.2<br>82(0              | 0.47<br>5(0.1              | -0.31<br>3(0.3          |

|   |       |              |                |                |                |                |                |                 |                |                |                |                |                |                |                |                |              |              |                |                |
|---|-------|--------------|----------------|----------------|----------------|----------------|----------------|-----------------|----------------|----------------|----------------|----------------|----------------|----------------|----------------|----------------|--------------|--------------|----------------|----------------|
| 2 | 9*)   | .611<br>)    | 33)            |                | 4)             | 4**)           | 8**)           | 45)             | 84)            | 27)            | 46)            | *)             | 21)            | 52)            | 9)             | 77)            | .658<br>)    | .401<br>)    | 40)            | 49)            |
| x | 0.217 | -0.2<br>27(0 | -0.57<br>7(0.0 | 0.65(<br>0.030 | -0.15<br>6(0.6 | 0.344<br>(0.30 | 0.275<br>(0.41 | -0.57(<br>0.067 | -0.56<br>7(0.0 | -0.52<br>6(0.0 | -0.51<br>9(0.1 | 0.49<br>6(0.1  | 1(0.0<br>00**  | -0.03<br>6(0.9 | 0.273<br>(0.41 | -0.17<br>4(0.6 | 0.03<br>4(0. | 0.10<br>9(0. | 0.53<br>4(0.0  | -0.47<br>6(0.1 |
| 1 | (0.52 | .503<br>)    | 63*)           | **)            | 48)            | 0)             | 3)             | *)              | 69*)           | 97*)           | 02)            | 21)            | *)             | 16)            | 7)             | 10)            | 921)         | 749)         | 91*)           | 38)            |
| 3 | 1)    |              |                |                |                |                |                |                 |                |                |                |                |                |                |                |                |              |              |                |                |
| x | -0.39 | 0.01         | -0.49          | -0.00          | 0.894          | -0.39          | -0.51          | -0.50           | -0.33          | -0.24          | -0.20          | -0.02          | -0.03          | 1(0.0          | 0.912          | 0.128          | 0.47         | 0.40         | -0.37          | -0.40          |
| 1 | (0.23 | 3(0.         | 8(0.1          | 2(0.9          | (0.00          | 5(0.2          | 3(0.1          | 4(0.1           | 1(0.3          | 5(0.4          | 2(0.5          | 1(0.9          | 6(0.9          | 00**           | (0.00          | (0.70          | 6(0.         | 9(0.         | 6(0.2          | 7(0.2          |
| 4 | 6)    | 970)         | 19)            | 96)            | 0***)          | 30)            | 07)            | 14)             | 20)            | 67)            | 51)            | 52)            | 16)            | *)             | 0***)          | 8)             | 139)         | 211)         | 55)            | 15)            |
| x | -0.39 | 0.08         | -0.73<br>7(0.0 | 0.299          | 0.814          | -0.36          | -0.48          | -0.74<br>3(0.0  | -0.52          | -0.50          | -0.30          | 0.12           | 0.27           | 0.912          | 1(0.0          | 0.153          | 0.47         | 0.31         | -0.20          | -0.62          |
| 1 | 2(0.2 | 4(0.         | 10**           | (0.37          | (0.00          | 4(0.2          | 5(0.1          | 09**            | (0.10          | 9(0.1          | 3(0.3          | 7(0.7          | 3(0.4          | (0.00          | 00**           | (0.65          | 3(0.         | 3(0.         | 9(0.5          | 2(0.0          |
| 5 | 33)   | 806)         | *)             | 2)             | 2***)          | 71)            | 30)            | *)              | 1)             | 10)            | 65)            | 09)            | 17)            | 0***)          | *)             | 3)             | 142)         | 348)         | 37)            | 41**)          |
| x | 0.153 | 0.30         | -0.1(0         | 0.05(<br>0.884 | 0.119<br>(0.72 | -0.66<br>5(0.0 | -0.14<br>5(0.6 | -0.1(0<br>.769) | 0.027<br>(0.93 | 0.161<br>(0.63 | 0.444<br>(0.17 | -0.18<br>9(0.5 | -0.17<br>4(0.6 | 0.128<br>(0.70 | 0.153<br>(0.65 | 1(0.0<br>00**  | -0.1<br>39(0 | 0.00<br>8(0. | -0.21<br>4(0.5 | 0.275<br>(0.41 |
| 1 | (0.65 | 5(0.         | .769)          | )              | 7)             | 26**<br>)      | 70)            |                 | 6)             | 7)             | 1)             | 77)            | 10)            | 8)             | 3)             | *)             | .684<br>)    | 980)         | 27)            | 4)             |
| 6 | 4)    | 362)         |                |                |                |                |                |                 |                |                |                |                |                |                |                |                |              |              |                |                |
| x | -0.24 | -0.0<br>01(0 | -0.41<br>3(0.2 | 0.381<br>(0.24 | 0.218<br>(0.51 | -0.46<br>5(0.1 | -0.31<br>2(0.3 | -0.42<br>6(0.1  | -0.30<br>3(0.3 | -0.39<br>6(0.2 | -0.01<br>2(0.9 | -0.15<br>1(0.6 | 0.03<br>4(0.9  | 0.476<br>(0.13 | 0.473<br>(0.14 | -0.13<br>9(0.6 | 1(0.<br>000  | 0.15<br>4(0. | 0.07<br>6(0.8  | -0.15<br>9(0.6 |
| 1 | 8(0.4 | .997<br>)    | 07)            | 8)             | 9)             | 50)            | 49)            | 92)             | 65)            | 28)            | 73)            | 58)            | 21)            | 9)             | 2)             | 84)            | ***)         | 652)         | 24)            | 41)            |
| 7 | 62)   |              |                |                |                |                |                |                 |                |                |                |                |                |                |                |                |              |              |                |                |
| x | -0.36 | -0.2<br>29(0 | -0.09<br>5(0.7 | 0.131<br>(0.70 | 0.108<br>(0.75 | -0.21<br>5(0.5 | -0.49<br>1(0.1 | -0.09<br>7(0.7  | 0.044<br>(0.89 | 0.154<br>(0.65 | -0.00<br>2(0.9 | -0.28<br>2(0.4 | 0.10<br>9(0.7  | 0.409<br>(0.21 | 0.313<br>(0.34 | 0.008<br>(0.98 | 0.15<br>4(0. | 1(0.<br>000  | -0.38<br>7(0.2 | -0.04<br>1(0.9 |
| 1 | 5(0.2 | .499<br>)    | 82)            | 2)             | 2)             | 26)            | 25)            | 76)             | 7)             | 2)             | 95)            | 01)            | 49)            | 1)             | 8)             | 0)             | 652)         | ***)         | 39)            | 05)            |
| 8 | 69)   |              |                |                |                |                |                |                 |                |                |                |                |                |                |                |                |              |              |                |                |
| x | 0.448 | 0.24         | -0.26          | 0.475          | -0.47          | 0.365          | 0.678          | -0.25           | -0.46          | -0.41          | -0.32          | 0.47           | 0.53           | -0.37          | -0.20          | -0.21          | 0.07         | -0.3         | 1(0.0          | -0.10          |

|   |       |      |       |       |       |       |       |       |       |       |       |       |       |       |       |       |      |      |       |       |
|---|-------|------|-------|-------|-------|-------|-------|-------|-------|-------|-------|-------|-------|-------|-------|-------|------|------|-------|-------|
| 1 | (0.16 | 1(0. | 5(0.4 | (0.14 | (0.14 | (0.26 | (0.02 | 8(0.4 | 4(0.1 | (0.21 | 4(0.3 | 5(0.1 | 4(0.0 | 6(0.2 | 9(0.5 | 4(0.5 | 6(0. | 87(0 | 00**  | 5(0.7 |
| 9 | 6)    | 475) | 31)   | 0)    | 5)    | 9)    | 2**)  | 44)   | 51)   | 0)    | 31)   | 40)   | 91*)  | 55)   | 37)   | 27)   | 824) | .239 | *)    | 58)   |
|   |       |      |       |       |       |       |       |       |       |       |       |       |       |       |       |       |      | )    |       |       |
| x | 0.251 | -0.0 | 0.779 | -0.50 | -0.45 | -0.21 | 0.174 | 0.779 | 0.651 | 0.844 | 0.61( | -0.31 | -0.47 | -0.40 | -0.62 | 0.275 | -0.1 | -0.0 | -0.10 | 1(0.0 |
| 2 | (0.45 | 36(0 | (0.00 | 7(0.1 | 8(0.1 | 9(0.5 | (0.60 | (0.00 | (0.03 | (0.00 | 0.046 | 3(0.3 | 6(0.1 | 7(0.2 | 2(0.0 | (0.41 | 59(0 | 41(0 | 5(0.7 | 00**  |
| 0 | 7)    | .917 | 5***) | 12)   | 56)   | 18)   | 9)    | 5***) | 0**)  | 1***) | **)   | 49)   | 38)   | 15)   | 41**) | 4)    | .641 | .905 | 58)   | *)    |
|   |       | )    |       |       |       |       |       |       |       |       |       |       |       |       |       |       | )    | )    |       |       |

<sup>a</sup>X1-Palmitic acid, X2-Stearic acid, X3-Oleic acid, X4-Linoleic acid, X5-Linolenic acid, X6-Other fatty acids, X7-Saturated fatty acid, X8-Monounsaturated fatty acids, X9-Monounsaturated fatty acids/saturated fatty acids, X10-Monounsaturated fatty acids / polyunsaturated fatty acids, X11-Monounsaturated fatty acids/other fatty acids, X12-Acid value, X13-Peroxide value, X14-Refractive index, X15-Iodine value, X16-Saponification number, X17-Unsaponifiable, X18-Price (CNY), X19-Moisture and volatiles, X20-Induction time

Supplemental material Table S7 Total variance interpretation

| Component | Feature root | Variance contribution/% | Cumulative variance contribution/% |
|-----------|--------------|-------------------------|------------------------------------|
| 1         | 7.088        | 35.442                  | 35.442                             |
| 2         | 4.998        | 24.988                  | 60.43                              |
| 3         | 2.206        | 11.028                  | 71.458                             |
| 4         | 1.63         | 8.15                    | 79.609                             |
| 5         | 1.268        | 6.339                   | 85.948                             |
| 6         | 1.011        | 5.057                   | 91.005                             |
| 7         | 0.757        | 3.786                   | 94.791                             |
| 8         | 0.552        | 2.76                    | 97.551                             |

|    |       |       |        |
|----|-------|-------|--------|
| 9  | 0.343 | 1.716 | 99.267 |
| 10 | 0.147 | 0.733 | 100    |
| 11 |       | 0     | 100    |
| 12 |       | 0     | 100    |
| 13 |       | 0     | 100    |
| 14 |       | 0     | 100    |
| 15 |       | 0     | 100    |
| 16 |       | 0     | 100    |
| 17 |       | 0     | 100    |
| 18 |       | 0     | 100    |
| 19 |       | 0     | 100    |
| 20 |       | 0     | 100    |

---

Supplemental material Table S8 Factor load factor

|     | PC1    | PC2    | PC3    | PC4    | PC5    | Co-commonality<br>(common factor<br>variance) |
|-----|--------|--------|--------|--------|--------|-----------------------------------------------|
| x1  | 0.008  | 0.748  | 0.024  | 0.469  | 0.391  | 0.933                                         |
| x2  | -0.125 | -0.152 | 0.657  | 0.119  | -0.585 | 0.828                                         |
| x3  | 0.975  | 0.09   | -0.144 | -0.069 | -0.067 | 0.988                                         |
| x4  | -0.739 | 0.126  | 0.521  | -0.345 | 0.157  | 0.977                                         |
| x5  | -0.378 | -0.615 | -0.479 | 0.467  | -0.148 | 0.991                                         |
| x6  | -0.07  | 0.776  | -0.576 | -0.127 | -0.142 | 0.976                                         |
| x7  | -0.035 | 0.923  | 0.016  | 0.287  | 0.06   | 0.94                                          |
| x8  | 0.974  | 0.103  | -0.147 | -0.065 | -0.064 | 0.989                                         |
| x9  | 0.921  | -0.209 | -0.121 | -0.116 | -0.011 | 0.92                                          |
| x10 | 0.895  | -0.13  | -0.069 | 0.015  | 0.148  | 0.845                                         |
| x11 | 0.689  | -0.324 | 0.291  | 0.148  | 0.158  | 0.712                                         |
| x12 | -0.425 | 0.579  | -0.314 | 0.373  | 0.049  | 0.756                                         |
| x13 | -0.641 | 0.406  | -0.028 | -0.258 | 0.369  | 0.78                                          |
| x14 | -0.491 | -0.715 | -0.305 | 0.252  | 0.063  | 0.912                                         |
| x15 | -0.724 | -0.606 | -0.17  | 0.185  | 0.06   | 0.958                                         |
| x16 | 0.097  | -0.321 | 0.549  | 0.6    | 0.338  | 0.889                                         |
| x17 | -0.41  | -0.393 | 0.195  | -0.202 | 0.103  | 0.412                                         |
| x18 | -0.071 | -0.476 | -0.186 | -0.433 | 0.545  | 0.75                                          |

|     |        |       |       |        |        |       |
|-----|--------|-------|-------|--------|--------|-------|
| x19 | -0.345 | 0.716 | 0.362 | -0.072 | -0.093 | 0.776 |
| x20 | 0.834  | 0.08  | 0.259 | 0.134  | 0.264  | 0.857 |

Supplemental material Table S9 Feature vector standardization

|     | PC1    | PC2    | PC3    | PC4    | PC5    |
|-----|--------|--------|--------|--------|--------|
| x1  | 0.001  | 0.15   | 0.011  | 0.288  | 0.308  |
| x2  | -0.018 | -0.03  | 0.298  | 0.073  | -0.462 |
| x3  | 0.138  | 0.018  | -0.065 | -0.043 | -0.053 |
| x4  | -0.104 | 0.025  | 0.236  | -0.212 | 0.124  |
| x5  | -0.053 | -0.123 | -0.217 | 0.287  | -0.117 |
| x6  | -0.01  | 0.155  | -0.261 | -0.078 | -0.112 |
| x7  | -0.005 | 0.185  | 0.007  | 0.176  | 0.047  |
| x8  | 0.137  | 0.021  | -0.067 | -0.04  | -0.05  |
| x9  | 0.13   | -0.042 | -0.055 | -0.071 | -0.009 |
| x10 | 0.126  | -0.026 | -0.031 | 0.009  | 0.117  |
| x11 | 0.097  | -0.065 | 0.132  | 0.091  | 0.124  |
| x12 | -0.06  | 0.116  | -0.142 | 0.229  | 0.039  |
| x13 | -0.09  | 0.081  | -0.013 | -0.158 | 0.291  |
| x14 | -0.069 | -0.143 | -0.138 | 0.155  | 0.05   |
| x15 | -0.102 | -0.121 | -0.077 | 0.114  | 0.048  |
| x16 | 0.014  | -0.064 | 0.249  | 0.368  | 0.267  |
| x17 | -0.058 | -0.079 | 0.088  | -0.124 | 0.081  |
| x18 | -0.01  | -0.095 | -0.084 | -0.266 | 0.43   |
| x19 | -0.049 | 0.143  | 0.164  | -0.044 | -0.073 |
| x20 | 0.118  | 0.016  | 0.117  | 0.082  | 0.209  |



Supplemental material Table S10 Principal components and overall scores

| Rank | Vegetable oils    | Composite score | PC1    | PC2    | PC3    | PC4    | PC5    |
|------|-------------------|-----------------|--------|--------|--------|--------|--------|
| 1    | Camellia seed oil | 0.683           | 1.925  | -0.673 | 0.153  | 0.158  | 0.678  |
| 2    | Olive oil         | 0.65            | 1.74   | -0.262 | -0.142 | 0.06   | 0.288  |
| 3    | Rice oil          | 0.529           | -0.337 | 2.169  | -1.026 | 1.006  | 1.001  |
| 4    | Peanut oil        | 0.229           | 0.181  | 0.738  | -0.148 | 0.151  | -0.749 |
| 5    | Sesame oil        | 0.138           | -0.009 | -0.132 | 1.569  | 0.334  | -0.718 |
| 6    | Corn oil          | 0.02            | -0.354 | 0.052  | 0.689  | -0.102 | 0.981  |
| 7    | Soybean oil       | -0.053          | -0.706 | 0.328  | 0.91   | 0.281  | -0.017 |
| 8    | Sunflower oil     | -0.214          | -0.696 | 0.083  | 1.125  | -0.314 | -0.896 |
| 9    | Rapeseed oil      | -0.255          | 0.233  | 0.355  | -1.416 | -1.556 | -1.702 |
| 10   | Walnut oil        | -0.785          | -1.044 | -0.858 | -0.422 | -1.772 | 1.585  |
| 11   | Flaxseed oil      | -0.94           | -0.933 | -1.798 | -1.292 | 1.755  | -0.453 |

Supplemental material Table S11 Experimental design and results of Box-Behnken in CSO deacidification

| NO. | A-Deacidification<br>temperature (°C) <sup>a</sup> | B-Reaction<br>time<br>(min) <sup>b</sup> | C-Excess<br>alkali<br>amount<br>(%) <sup>c</sup> | Acid value<br>(mgKOH/g) |
|-----|----------------------------------------------------|------------------------------------------|--------------------------------------------------|-------------------------|
| 1   | -1                                                 | -1                                       | 0                                                | 0.142                   |
| 2   | -1                                                 | 1                                        | 0                                                | 0.128                   |
| 3   | 0                                                  | 1                                        | -1                                               | 0.125                   |
| 4   | 0                                                  | -1                                       | 1                                                | 0.110                   |
| 5   | -1                                                 | 0                                        | -1                                               | 0.116                   |
| 6   | -1                                                 | 0                                        | 1                                                | 0.108                   |
| 7   | 0                                                  | 0                                        | 0                                                | 0.056                   |
| 8   | 0                                                  | 0                                        | 0                                                | 0.064                   |
| 9   | 1                                                  | -1                                       | 0                                                | 0.134                   |
| 10  | 1                                                  | 0                                        | -1                                               | 0.130                   |
| 11  | 0                                                  | -1                                       | -1                                               | 0.120                   |
| 12  | 0                                                  | 1                                        | 1                                                | 0.106                   |
| 13  | 1                                                  | 0                                        | 1                                                | 0.108                   |
| 14  | 0                                                  | 0                                        | 0                                                | 0.070                   |
| 15  | 1                                                  | 1                                        | 0                                                | 0.098                   |

<sup>a</sup>Deacidification temperature was set to 80°C (-1), 85°C(0) and 90°C (1) ;

<sup>b</sup>Reaction time was set to 55min (-1), 65min (0) and 75min (1);

<sup>c</sup>Excess alkali amount was set to 0.1%(-1), 0.2%(0) and 0.3%(1).

Supplemental material Table S12 Variance analysis of parameters in regression equation of integrated membership grade in CSO deacidification

| Source        | Sum of squares | df | Mean square | F-value | p-value | Significance    |
|---------------|----------------|----|-------------|---------|---------|-----------------|
| Model         | 8.40E-03       | 9  | 9.33E-04    | 7.13    | 0.0218  | *               |
| A-A           | 1.45E-04       | 1  | 1.45E-05    | 1.1     | 0.3415  |                 |
| B-B           | 3.00E-04       | 1  | 3.00E-04    | 2.29    | 0.1904  |                 |
| C-C           | 3.00E-04       | 1  | 3.00E-04    | 2.29    | 0.1904  |                 |
| AB            | 1.21E-04       | 1  | 1.21E-04    | 0.92    | 0.3805  |                 |
| AC            | 4.00E-05       | 1  | 4.01E-05    | 0.031   | 0.8681  |                 |
| BC            | 2.03E-05       | 1  | 2.03E-05    | 0.15    | 0.7103  |                 |
| A^2           | 3.31E-03       | 1  | 3.31E-03    | 25.32   | 0.0040  | **              |
| B^2           | 3.83E-03       | 1  | 3.83E-03    | 29.27   | 0.0029  | **              |
| C^2           | 1.40E-04       | 1  | 1.40E-04    | 10.96   | 0.0212  | **              |
| Residual      | 6.54E-03       | 5  | 1.43E-04    |         |         |                 |
| Lack of Fit   | 5.56E-04       | 3  | 1.31E-04    | 3.76    | 0.2174  | not significant |
| Pure Error    | 9.95E-04       | 2  | 1.85E-04    |         |         |                 |
| Cor Total     | 9.05E-03       | 14 |             |         |         |                 |
| R-Squared     | 0.9734         |    |             |         |         |                 |
| Adj R-Squared | 0.9420         |    |             |         |         |                 |

$$Y_2 = 2.30283 - 0.16388 \times A - 0.035288 \times B - 2.09750 \times C - 11.4753 \times AB - 0.010 \times AC - 15.2323 \times BC + 17.3588 \times A^2 + 4.7551 \times B^2 + 7.2883 \times C^2$$

Supplemental material Table S13 Experimental design and results of Box-Benhnken in CSO decolorization

| NO. | Decolorization temperature (°C) <sup>a</sup> | Decolorization time (min) <sup>b</sup> | Decolorizer dosage (%) <sup>c</sup> | Decolorization rate (%) |
|-----|----------------------------------------------|----------------------------------------|-------------------------------------|-------------------------|
| 1   | -1                                           | -1                                     | 0                                   | 82.13                   |
| 2   | -1                                           | 1                                      | 0                                   | 84.67                   |
| 3   | 0                                            | 1                                      | -1                                  | 89.04                   |
| 4   | 0                                            | -1                                     | 1                                   | 90.89                   |
| 5   | -1                                           | 0                                      | -1                                  | 83.42                   |
| 6   | -1                                           | 0                                      | 1                                   | 87.59                   |
| 7   | 0                                            | 0                                      | 0                                   | 88.71                   |
| 8   | 0                                            | 0                                      | 0                                   | 91.05                   |
| 9   | 1                                            | -1                                     | 0                                   | 83.46                   |
| 10  | 1                                            | 0                                      | -1                                  | 88.26                   |
| 11  | 0                                            | -1                                     | -1                                  | 87.18                   |
| 12  | 0                                            | 1                                      | 1                                   | 92.48                   |
| 13  | 1                                            | 0                                      | 1                                   | 92.52                   |
| 14  | 0                                            | 0                                      | 0                                   | 91.79                   |
| 15  | 1                                            | 1                                      | 0                                   | 92.03                   |

<sup>a</sup>Decolorization temperature was set to 75°C (-1), 85°C(0) and 95°C (1) ;

<sup>b</sup>Decolorization time was set to 15min (-1), 25min (0) and 35min (1);

<sup>c</sup>Decolorizer dosage was set to 2%(-1), 3%(0) and 4%(1).

Supplemental material Table S14 Variance analysis of parameters in regression equation of integrated membership grade in CSO decolorization

| Source        | Sum of Squares | df | Mean Square | F-value  | Prob > F | Significance |
|---------------|----------------|----|-------------|----------|----------|--------------|
| Model         | 174.5          | 9  | 19.39       | 46.87    | 0.0003   | **           |
| A-A           | 14.85          | 1  | 14.85       | 35.9     | 0.0019   | **           |
| B-B           | 67.45          | 1  | 67.45       | 163.07   | < 0.0001 | **           |
| C-C           | 34.82          | 1  | 34.82       | 84.17    | 0.0003   | **           |
| AB            | 0.12           | 1  | 0.12        | 0.29     | 0.6147   |              |
| AC            | 8.40E-01       | 1  | 8.40E-01    | 2.02E+00 | 0.2141   |              |
| BC            | 0.063          | 1  | 0.063       | 0.15     | 0.7135   |              |
| A^2           | 28.78          | 1  | 28.78       | 69.56    | 0.0004   | **           |
| B^2           | 25.72          | 1  | 25.72       | 62.17    | 0.0005   | **           |
| C^2           | 9.8            | 1  | 9.8         | 23.69    | 0.0046   | **           |
| Residual      | 2.07           | 5  | 0.41        |          |          |              |
| Lack of Fit   | 1.79           | 3  | 0.6         | 4.31     | 0.1939   |              |
| Pure Error    | 0.28           | 2  | 0.14        |          |          |              |
| Cor Total     | 176.57         | 14 |             |          |          |              |
| R-Squared     | 0.9883         |    |             |          |          |              |
| Adj R-Squared | 0.9672         |    |             |          |          |              |

$$Y_3 = -161.340 + 4.722 \times A + 1.948 \times B + 14.884 \times C - 7.689 \times AB - 0.046 \times AC + 0.013 \times BC - 0.027 \times A^2 - 0.026 \times B^2 - 1.586 \times C^2$$

Supplemental material Table S15 The fatty acid composition and conventional physicochemical indexes of CSO and other pharmacopoeias

| Parameters                    | This study-injection<br>CSO              | Chinese Pharmacopoeia                                          | United States<br>Pharmacopoeia           | European<br>Pharmacopoeia                                            | Japanese<br>Pharmacopoeia                                            |
|-------------------------------|------------------------------------------|----------------------------------------------------------------|------------------------------------------|----------------------------------------------------------------------|----------------------------------------------------------------------|
| Characters                    | Clarification,transpar<br>ency, odorless | Pale yellow transparent liquid; Odorless or<br>almost odorless | Transparent,almost<br>transparent liquid | Pale yellow<br>transparent liquid;<br>Odorless or almost<br>odorless | Pale yellow<br>transparent liquid;<br>Odorless or almost<br>odorless |
| Relative density              | 0.916                                    | 0.916~0.922                                                    | 0.916~0.922                              | 0.910-0.930                                                          | 0.920-0.938                                                          |
| Refractive index<br>(20 °C)   | 1.473                                    | 1.472~1.476                                                    | 1.460-1.70                               | 1.470-0.476                                                          | 1.465-1.475                                                          |
| Acid value                    | 0.0515 (mgKOH/g)                         | ≤0.1 (mgKOH/g)                                                 | ≤0.6 (mgNaOH/g)<br>(pH6-8)               | ≤0.5 (mg KOH/g)                                                      | ≤0.5 (mgNaOH/g)<br>(pH6-8)                                           |
| Saponification<br>value       | 187 (mgKOH/g)                            | 188~195 (mgKOH/g)                                              | 189-195 (mgKOH/g)                        | 0.1-0.2 (gNaOH/g)                                                    | 189-195 (mgKOH/g)                                                    |
| Iodine value                  | 72 (g/100g)                              | 126~140 (g/100g)                                               | 0.4-0.7 (g/100g)                         | 50 (g/100g)                                                          | 50-111 (g/100g)                                                      |
| Absorbance                    | 0.015                                    | ≤0.045                                                         | -                                        | -                                                                    | -                                                                    |
| Peroxide value<br>(%)         | 0.82                                     | ≤3ml                                                           | 5 mg/L                                   | 0.2mg/g                                                              | 0.25mg/g                                                             |
| Unsaponifiable<br>(%)         | 0.51%                                    | ≤1.0%                                                          | ≤1%                                      | ≤0.05%                                                               | ≤0.15%                                                               |
| Moisture and<br>volatiles (%) | 0.03%                                    | ≤0.1%                                                          | 0.2%                                     | 0.1-0.2%                                                             | 0.05%                                                                |

|                               |                                                                                                                                                 |                                                                                                                                         |                                                                                                                              |                                                                                                                          |                                                                                                           |
|-------------------------------|-------------------------------------------------------------------------------------------------------------------------------------------------|-----------------------------------------------------------------------------------------------------------------------------------------|------------------------------------------------------------------------------------------------------------------------------|--------------------------------------------------------------------------------------------------------------------------|-----------------------------------------------------------------------------------------------------------|
| Fatty acid composition        | Palmitic acid 7.12%,<br>stearic acid 2.03%,<br>oleic acid 81.09%,<br>linoleic acid 9.12%,<br>linolenic acid 0.28%,<br>unsaturated fat<br>90.49% | Palmitic acid 7.0%~14.0%, stearic acid<br>1.0%~6.0%, oleic acid 18.0%~30.0%,<br>linoleic acid 44.0%~62.0%, linolenic acid<br>4.0%~11.0% | Palmitic acid ~10%,<br>stearic acid -0.3%,<br>oleic acid 98%~107%,<br>linoleic acid<br>55.0%~75.0%,<br>linolenic acid -30.0% | Palmitic acid ~10%,<br>stearic acid -05%,<br>oleic acid 75%~85%,<br>linoleic acid<br>50.0%~75.0%,<br>linolenic acid -50% | Palmitic acid ~2%,<br>stearic acid -2%,<br>oleic acid 98%,<br>linoleic acid 50.0%,<br>linolenic acid -50% |
| Heavy metal<br>limits (mg/kg) | 1                                                                                                                                               | ≤2                                                                                                                                      | ≤0.5                                                                                                                         | ≤5                                                                                                                       | ≤1.1ppm                                                                                                   |

---
